# Supplementary material for: Sensory Processing, Functional Performance and Quality of Life in Unilateral Cerebral Palsy Children: A Cross-Sectional Study
Source: PubMed Central journal article supplement (PMC7579654; doi:10.3390/ijerph17197116), 2020-09-28
Supplement: ijerph-17-07116-s001.pdf [file ijerph-17-07116-s001.pdf]

**Table S1.** Correlations between CSP-2 and PEDI-CAT domains.

| CSP-2        | All (TD + UCP) n (49) |          |         |         | TD n (23) |        |         |        | UCP n (26) |        |       |       |
|--------------|-----------------------|----------|---------|---------|-----------|--------|---------|--------|------------|--------|-------|-------|
|              | DA                    | M        | S/C     | R       | DA        | M      | S/C     | R      | DA         | M      | S/C   | R     |
| Seeking      | -0.05                 | -0.06    | -0.29*  | -0.08   | -0.23     | -0.18  | -0.32   | 0.02   | 0.05       | 0.03   | -0.23 | -0.13 |
| Avoidance    | -0.44**               | -0.41**  | -0.25   | -0.23   | -0.48*    | -0.33  | -0.37   | -0.43* | -0.07      | -0.16  | -0.01 | -0.06 |
| Sensitivity  | -0.34*                | -0.32*   | -0.32*  | -0.32*  | -0.43*    | -0.19  | -0.42*  | -0.33  | -0.09      | -0.18  | -0.17 | -0.3  |
| Registration | -0.58***              | -0.48*** | -0.34*  | -0.13   | -0.42*    | -0.15  | -0.43*  | -0.04  | -0.14      | -0.21  | -0.06 | -0.04 |
| Auditory     | -0.24                 | -0.17    | -0.23   | -0.37** | -0.2      | 0.03   | -0.16   | -0.46* | 0.04       | -0.04  | -0.14 | -0.31 |
| Visual       | -0.04                 | -0.1     | -0.31*  | -0.12   | -0.26     | -0.2   | -0.37   | -0.09  | 0.02       | -0.02  | -0.27 | -0.14 |
| Touch        | -0.22                 | -0.16    | -0.18   | 0.04    | -0.35     | -0.07  | -0.28   | 0.22   | -0.07      | -0.06  | -0.02 | -0.07 |
| Movement     | -0.19                 | -0.12    | -0.18   | -0.08   | -0.1      | 0.13   | -0.14   | 0.13   | 0.01       | -0.05  | -0.09 | -0.21 |
| BodyPos      | -0.70***              | -0.67*** | -0.41** | -0.13   | -0.46*    | -0.37  | -0.58** | 0.04   | -0.39*     | -0.39* | -0.21 | -0.05 |
| Oral         | -0.36*                | -0.41**  | -0.27   | -0.31*  | -0.31     | -0.44* | -0.38   | -0.32  | -0.06      | -0.12  | -0.05 | -0.26 |
| Conductual   | -0.08                 | -0.03    | -0.01   | -0.03   | -0.19     | 0.12   | -0.16   | 0.01   | 0.11       | -0.01  | 0.16  | -0.03 |
| Social-Emo   | -0.46***              | -0.44**  | -0.27   | -0.11   | -0.43*    | -0.31  | -0.29   | -0.28  | -0.12      | -0.23  | -0.02 | 0.08  |
| Attentional  | -0.27                 | -0.24    | -0.29*  | -0.12   | -0.42*    | -0.19  | -0.43*  | -0.18  | 0.14       | 0.06   | 0.01  | 0.04  |

CSP-2: Child Sensory Profile 2; PEDI-CAT: Pediatric Evaluation of Disability Inventory – Computer Adaptive Test; TD: Typical Development; UCP: Unilateral Cerebral Palsy; SD: Standard Deviation; BodyPos: Body Position; Social-Emo: Social-Emotional; DA: Daily Activities; M: Mobility; S/C: Social/Cognitive; R: Responsibility. Pearson correlation's coefficients; \*\*\* =  $p < 0.001$ ; \*\* =  $p < 0.01$ ; \*  $p < 0.5$ .

**Table S2.** Correlations between CSP-2 and KD-27 and KD-10 domains.

| CSP-2        | All (TD+ UCP) n (36) |       |        |        |          |       | TD n (16) |       |       |        |       |       | UCP n (20) |         |       |       |         |       |
|--------------|----------------------|-------|--------|--------|----------|-------|-----------|-------|-------|--------|-------|-------|------------|---------|-------|-------|---------|-------|
|              | KS-27                |       |        |        |          | KS10  | KS-27     |       |       |        |       | KS10  | KS-27      |         |       |       |         | KS10  |
|              | PW                   | PCW   | P&A    | SS&P   | SE       | GI    | PW        | PCW   | P&A   | SS&P   | SE    | GI    | PW         | PCW     | P&A   | SS&P  | SE      | GI    |
| Seeking      | 0.07                 | -0.17 | 0.01   | -0.24  | -0.24    | -0.15 | 0.33      | 0.10  | 0.07  | -0.50* | -0.23 | -0.01 | -0.18      | -0.24   | 0.10  | -0.07 | -0.18   | -0.31 |
| Avoidance    | -0.06                | -0.09 | 0.45** | -0.11  | -0.20    | -0.23 | 0.30      | 0.33  | 0.57* | 0.04   | -0.05 | -0.19 | -0.11      | -0.36   | 0.30  | -0.27 | -0.39   | -0.11 |
| Sensitivity  | -0.07                | -0.17 | 0.20   | -0.13  | -0.29    | -0.18 | 0.29      | 0.18  | 0.56* | -0.17  | -0.26 | -0.06 | -0.19      | -0.34   | -0.01 | -0.14 | -0.43   | -0.14 |
| Registration | -0.25                | -0.14 | 0.19   | -0.17  | 0.02     | -0.15 | 0.29      | 0.16  | 0.11  | -0.53* | -0.04 | 0.08  | -0.20      | -0.44   | 0.05  | -0.15 | -0.20   | 0.08  |
| Auditory     | -0.05                | -0.13 | 0.11   | -0.15  | -0.52*** | -0.12 | 0.40      | 0.31  | 0.38  | 0.08   | -0.50 | -0.25 | -0.28      | -0.35   | -0.11 | -0.25 | -0.63** | -0.02 |
| Visual       | -0.06                | -0.17 | -0.11  | -0.39* | -0.42**  | -0.06 | -0.02     | -0.25 | -0.22 | -0.53* | -0.16 | 0.14  | -0.33      | -0.10   | 0.08  | -0.36 | -0.51*  | -0.26 |
| Touch        | 0.16                 | -0.17 | 0.08   | -0.13  | -0.10    | 0.06  | 0.46      | 0.02  | 0.11  | -0.32  | 0.17  | 0.17  | 0.11       | -0.34   | -0.07 | -0.01 | -0.46*  | 0.00  |
| Movement     | 0.06                 | -0.03 | 0.02   | -0.06  | 0.01     | -0.09 | 0.47      | 0.21  | -0.01 | -0.24  | -0.20 | -0.16 | -0.18      | -0.15   | 0.04  | 0.01  | 0.10    | -0.03 |
| BodyPos      | -0.40*               | -0.09 | 0.29   | -0.08  | 0.09     | -0.25 | -0.07     | 0.03  | 0.18  | -0.31  | -0.18 | -0.03 | -0.11      | -0.27   | 0.21  | 0.01  | 0.00    | -0.18 |
| Oral         | -0.18                | -0.12 | 0.36*  | -0.03  | 0.00     | -0.32 | -0.13     | -0.04 | 0.39  | -0.17  | -0.33 | -0.22 | -0.14      | -0.21   | 0.35  | -0.02 | -0.06   | -0.32 |
| Conductual   | 0.06                 | -0.27 | 0.04   | -0.19  | -0.11    | 0.17  | 0.40      | 0.21  | 0.11  | -0.42  | -0.14 | 0.01  | -0.18      | -0.64** | -0.06 | -0.03 | -0.15   | 0.34  |
| Social-Emo   | -0.13                | -0.12 | 0.49** | -0.04  | -0.01    | -0.24 | 0.24      | 0.31  | 0.56* | 0.29   | 0.20  | -0.17 | -0.20      | -0.49*  | 0.37  | -0.25 | -0.20   | -0.15 |
| Attentional  | -0.06                | -0.12 | 0.17   | -0.29  | -0.22    | -0.17 | 0.26      | 0.23  | 0.28  | -0.38  | -0.22 | -0.14 | -0.19      | -0.33   | 0.08  | -0.26 | -0.27   | -0.13 |

CSP-2: Child Sensory Profile 2; TD: Typical Development; UCP: Unilateral Cerebral Palsy; SD: Standard Deviation; BodyPos: Body Position; Social-Emo: Social-Emotional; PW: Physical Well-Being; PCW: Psychological Well-Being; P&A: Parents & Autonomy; SS&P: Social Support & Peers; SE: School Environment; GI: General Index; Pearson correlation's coefficients: \*\*\* =  $p < 0.001$ ; \*\* =  $p < 0.01$ ; \*  $p < 0.05$ .
